# Supplementary material for: Integrative Transcriptomic and Proteomic Analysis Reveals an Alternative Molecular Network of Glutamine Synthetase 2 Corresponding to Nitrogen Deficiency in Rice (Oryza sativa L.)
Source: MDPI journal article supplement (doi:10.3390/ijms22147674), 2021-07-18
Supplement: s1 [file s1]

**Supplementary Table S6.** A list of the selected DEGs for qRT-PCR validation.

| #ID            | 1N_FPKM    | 1/4N_FPKM  | log <sub>2</sub> FC | regulated | NR_annotation        |
|----------------|------------|------------|---------------------|-----------|----------------------|
| LOC_Os02g02170 | 22.055874  | 197.19722  | 3.31747201          | up        | <i>OsNRT2.1</i>      |
| LOC_Os02g02190 | 3.236936   | 181.750443 | 5.95118443          | up        | <i>OsNRT2.2</i>      |
| LOC_Os01g50820 | 16.658255  | 361.171936 | 4.59409704          | up        | <i>OsNRT2.3a</i>     |
| LOC_Os01g36720 | 0.283683   | 2.289304   | 2.96842927          | up        | <i>OsNRT2.4</i>      |
| LOC_Os02g38230 | 52.952381  | 671.419495 | 3.82136082          | up        | <i>OsNAR2.1</i>      |
| LOC_Os02g40710 | 2.699628   | 17.60108   | 2.84038042          | up        | <i>OsAMT1.3</i>      |
| LOC_Os02g40730 | 21.85079   | 88.213524  | 2.1700885           | up        | <i>OsAMT1.2</i>      |
| LOC_Os02g34580 | 0.222772   | 1.654249   | 2.72499263          | up        | <i>OsAMT3.3</i>      |
| LOC_Os02g53130 | 11.642644  | 27.493874  | 1.3973264           | up        | <i>OsNR2</i>         |
| LOC_Os01g45274 | 74.204513  | 172.73428  | 1.37811461          | up        | carbonic anhydrase   |
| LOC_Os01g01360 | 4.784554   | 1.196574   | -1.8131084          | down      | <i>OsNPF6.1</i>      |
| LOC_Os11g12740 | 23.039596  | 4.369908   | -2.2402866          | down      | <i>OsNPF4.1</i>      |
| LOC_Os05g48200 | 0.061253   | 0.317122   | 2.27828493          | up        | <i>OsNADH-GOGAT2</i> |
| LOC_Os02g50240 | 53.83755   | 210.194171 | 2.12672899          | up        | <i>OsGS1; 1</i>      |
| LOC_Os03g12290 | 121.597572 | 426.037476 | 1.96788266          | up        | <i>OsGS1; 2</i>      |
| LOC_Os03g50490 | 1.723211   | 7.012081   | 2.12211271          | up        | <i>OsGS1; 3</i>      |
| LOC_Os03g18130 | 66.694927  | 140.419938 | 1.24775866          | up        | <i>OsAS1</i>         |
