# Supplementary material for: Integrative Transcriptomic and Proteomic Analysis Reveals an Alternative Molecular Network of Glutamine Synthetase 2 Corresponding to Nitrogen Deficiency in Rice (Oryza sativa L.)
Source: MDPI journal article supplement (doi:10.3390/ijms22147674), 2021-07-18
Supplement: s1 [file s1]

**Supplementary Table S11.** Primers of mRNAs used in this study.

| <b>Primer ID</b>   | <b>Forward primers (5'to3')</b> | <b>Reverse primer (5'to3')</b> |
|--------------------|---------------------------------|--------------------------------|
| OsNRT2.1           | CTTCACGTCGTCGAGGTAC             | CACTCGGAGCCGTAGTAGTG           |
| OsNRT2.2           | CATCGCCGATACTTCTAC              | ATCCAAATGTTCCAGAGGCG           |
| OsNRT2.3a          | CGCTGCTGCCGCTCATCCG             | CCGTGCCCATGGCCAGAC             |
| OsNRT2.4           | CTCACCTTCGGCATCGTTCCTT          | CGTGTACCTGGACCCGCTGAAGA        |
| OsNAR2.1           | CTCGTTGGTGCTCGTCTTGCTCG         | GCACAGCTTCACCTTCACGCTCTTG      |
| OsAMT1.3           | TACGACTACGACTTCTTCCTCTCC        | GGTGAGGAAGGCGGAGTAGATGAGA      |
| OsAMT3.3           | ACCAGACCACTCCGTCATCG            | CGCCGAGTTGATAGCCCAC            |
| OsAMT1.2           | GCTTCGACTACAGCTTCTTCCTCTT       | GGTGAGGAAGGCGGAGTAGATGAGG      |
| OsNR2              | GCTGGTTCAGGGTGAAGACGAAG         | TTGAGGAACGGCGTGGACGTGCTGC      |
| carbonic anhydrase | GGATGGGTTCGCCAAGTTCA            | GCTTGATCTTGACAGTAAGCTGGGAC     |
| OsNPF6.1           | TACAGGAAGCGTCACATCAAGCACA       | GCCATGGGTATTGATTTCTTCTTG       |
| OsNPF4.1           | CTCTTCGCCGTCACCTTCTCCA          | GGTAGAAGCCGAAGGAGTAGGAGCAGT    |
| OsNADH-GOGAT2      | TCACGAAGGACGCAGGTT              | CCAAGCCCCGAGTTGTCTG            |
| OsGS1; 1           | CACGAGACCGCCGACATCAA            | ACGATGTAAGGGTCCATGTTGGACG      |
| OsGS1; 2           | AGACCGCCGACATCAACACCT           | CTGTCCTCGAAGTACCCCTTGCCCT      |
| OsGS1; 3           | ATTGCTGGCGTCGTCGTGT             | TGTTGATGTCGGCGGTCTCG           |
| OsAS1              | ATGTGCGGGATCCTGGCCGTG           | GCCGGTGCTGAACGTGTGCTTG         |
