# Supplementary material for: Integrative Transcriptomic and Proteomic Analysis Reveals an Alternative Molecular Network of Glutamine Synthetase 2 Corresponding to Nitrogen Deficiency in Rice (Oryza sativa L.)
Source: MDPI journal article supplement (doi:10.3390/ijms22147674), 2021-07-18
Supplement: s1 [file s1]

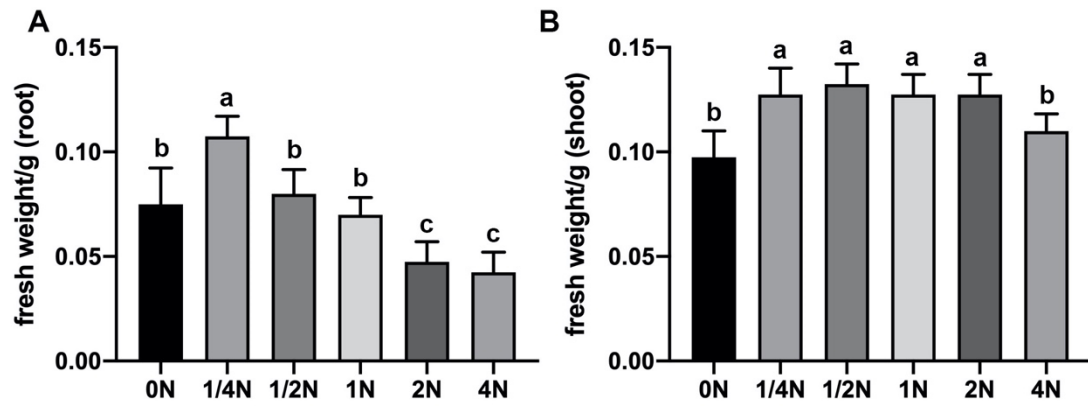

**Supplementary Figure S1.** Fresh weight (g) of the LY9348 in the roots (A) and in the shoots (B) grown hydroponically for 14 days at six N concentrations. Bars represented the standard error (SE;  $n=3$ ). Different letters indicate significant differences ( $P < 0.05$ , one-way ANOVA, Tukey's HSD test).

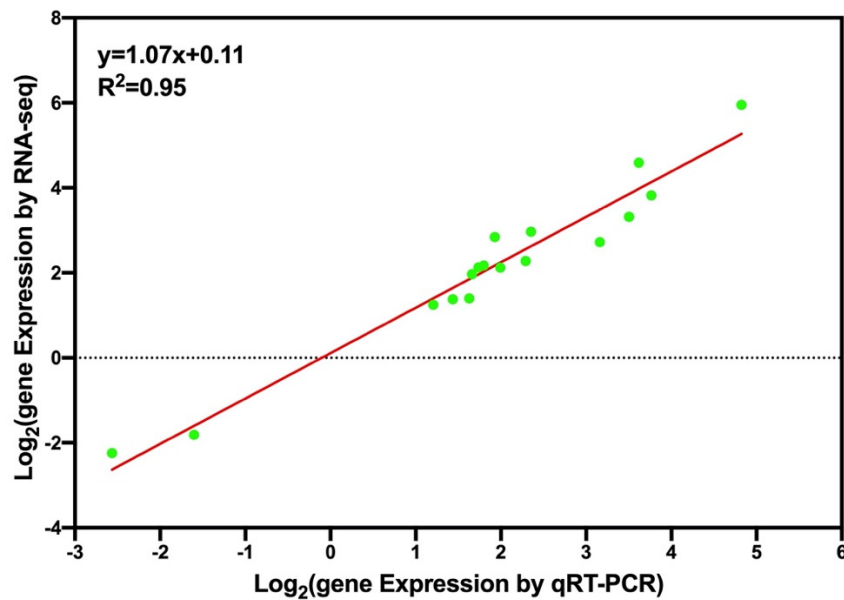

**Supplementary Figure S2.** Correlation analysis between qRT-PCR gene expression level and corresponding RNA-Seq data. \*\*:  $p < 0.01$ .

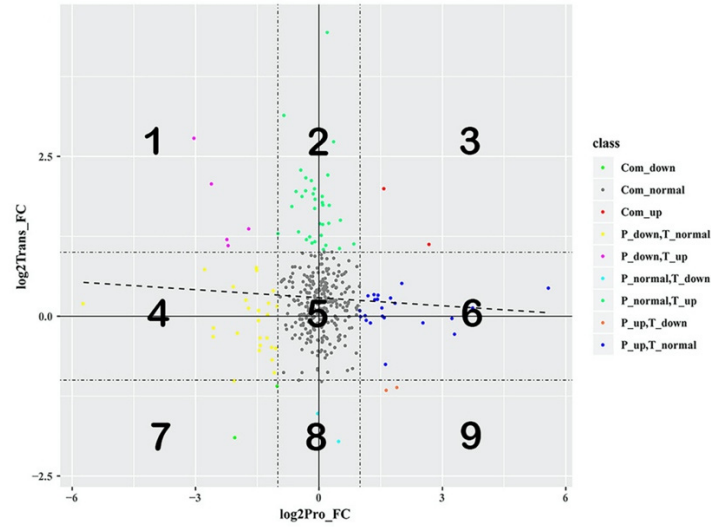

**Supplementary Figure S3.** Correlation diagram of expression ratio between transcriptome and proteome. The ordinate represented  $\log_2FC$  value of DEGs, and the abscissa represented  $\log_2FC$  value of DAPs

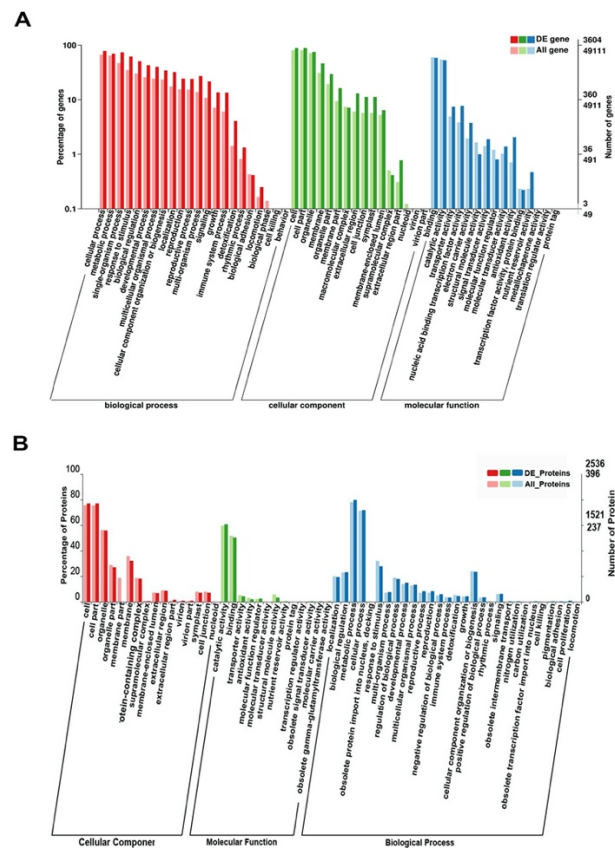

**Supplementary Figure S4.** Comparative analysis of GO annotation between DEGs and DAPs. (A) Functional categorization of DEGs between 1/4N and 1N; (B) Functional categorization of the DAPs between 1/4N and 1N. GO: Gene Ontology. DEGs: different expression genes; DAPs: different abundance proteins.

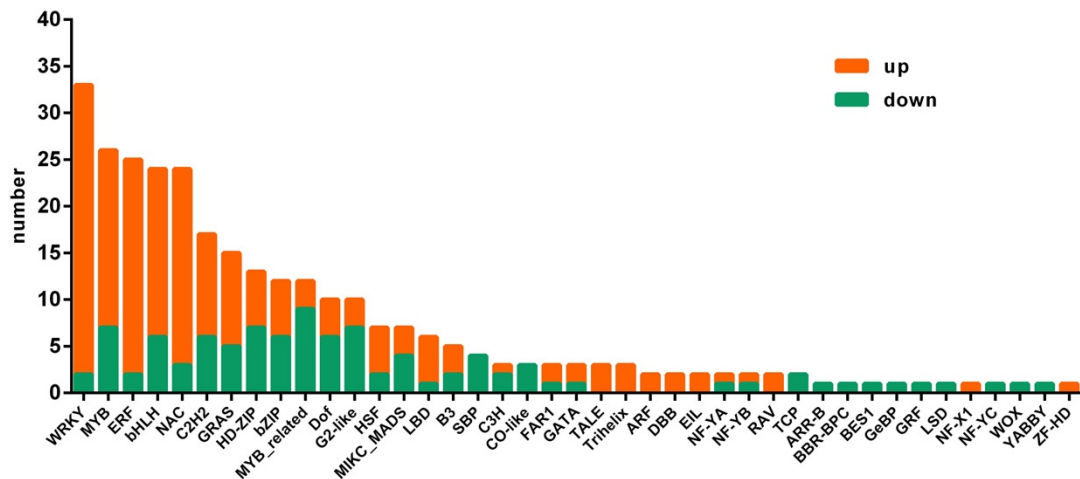

**Supplementary Figure S5.** The transcription factors (TFs) classification of DEGs analyzed through PlantTFDB website.

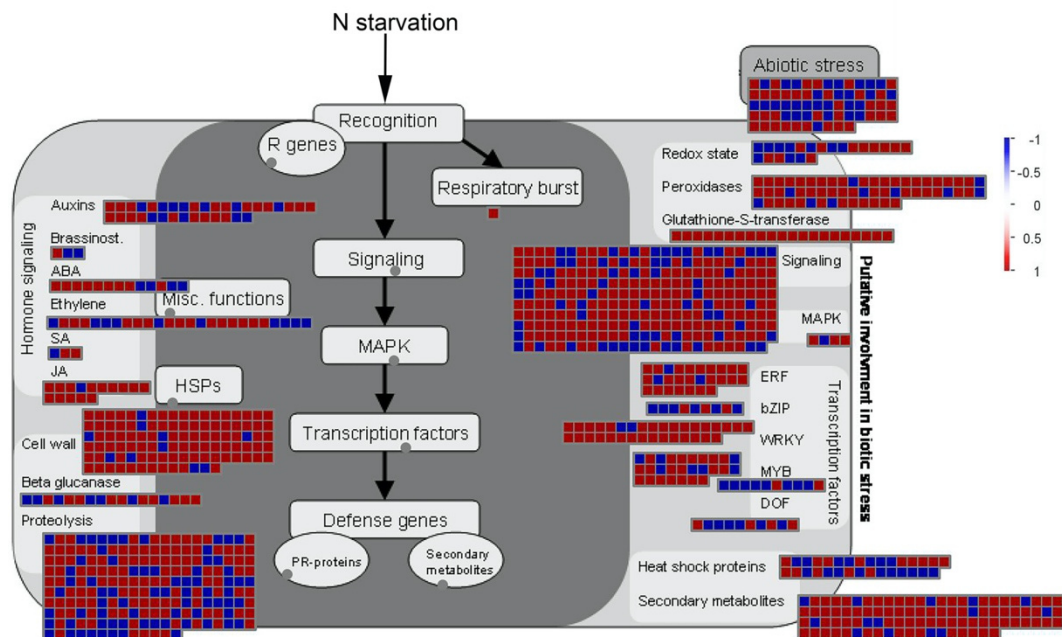

**Supplementary Figure S6.** The model of the regulation mechanism of rice roots in response to N starvation involves numerous pathways by MapMan software. Small squares represented DEGs. Red/blue indicated that gene expression level was induced/repressed compared with the control (1 N).
