# Supplementary material for: Integrative Transcriptomic and Proteomic Analysis Reveals an Alternative Molecular Network of Glutamine Synthetase 2 Corresponding to Nitrogen Deficiency in Rice (Oryza sativa L.)
Source: MDPI journal article supplement (doi:10.3390/ijms22147674), 2021-07-18
Supplement: s1 [file s1]

**Supplementary Table S3.** KEGG pathways associated with the number of up-regulated and down-regulated DAPs.

| Pathways                                               | P value   | Pathway ID | Up regulated | Down regulated |
|--------------------------------------------------------|-----------|------------|--------------|----------------|
| Phenylpropanoid Biosynthesis                           | 0.2502138 | ko00940    | 6            | 11             |
| Phenylalanine Metabolism                               | 0.1485072 | ko00360    | 6            | 10             |
| Oxidative phosphorylation                              | 0.8849044 | ko00190    | 6            | 8              |
| Glycolysis/Gluconeogenesis                             | 0.6223506 | ko00010    | 7            | 6              |
| Starch and Sucrose Metabolism                          | 0.3519892 | ko00500    | 3            | 10             |
| Glutathione Metabolism                                 | 0.1692994 | ko00480    | 7            | 5              |
| Alanine, Aspartate and Glutamate Metabolism            | 0.0839540 | ko00250    | 5            | 5              |
| Arginine and Proline Metabolism                        | 0.1501081 | ko00330    | 5            | 4              |
| Ubiquinone and Other terpenoid-quinone biosynthesis    | 0.0013467 | ko00130    | 3            | 5              |
| Fructose and Mannose metabolism                        | 0.3569871 | ko00051    | 2            | 5              |
| Pyruvate Metabolism                                    | 0.8653597 | ko00620    | 5            | 2              |
| Carbon fixation in Photosynthetic organisms            | 0.8342573 | ko00710    | 2            | 4              |
| Galactose Metabolism                                   | 0.2388235 | ko00052    | 1            | 5              |
| Glycine, Serine and Threonine metabolism               | 0.5047794 | ko00260    | 2            | 4              |
| Purine Metabolism                                      | 0.7693221 | ko00230    | 3            | 3              |
| Ubiquitin Mediated Proteolysis                         | 0.3256393 | ko04120    | 2            | 4              |
| Pentose phosphate pathway                              | 0.8224658 | ko00030    | 0            | 5              |
| Porphyrin and Chlorophyll Metabolism                   | 0.0116692 | ko00860    | 3            | 2              |
| Pyrimidine Metabolism                                  | 0.5171418 | ko00240    | 2            | 3              |
| Tropane, Piperidine and Pyridine Alkaloid Biosynthesis | 0.0398541 | ko00960    | 4            | 1              |
| Tyrosine Metabolism                                    | 0.4194729 | ko00350    | 3            | 2              |
| Amino sugar and nucleotide sugar Metabolism            | 0.8549613 | ko00520    | 2            | 2              |
| Ascorbate and Aldarate Metabolism                      | 0.7233889 | ko00053    | 2            | 2              |
| Flavonoid Biosynthesis                                 | 0.7842114 | ko00941    | 2            | 2              |
| Glyoxylate and Dicarboxylate Metabolism                | 0.4602095 | ko00630    | 1            | 3              |
| Lysine Biosynthesis                                    | 0.1040697 | ko00300    | 2            | 2              |
| N-Glycan Biosynthesis                                  | 0.0787221 | ko00510    | 1            | 3              |
| Nitrogen Metabolism: Reduction and Fixation            | 0.3190856 | ko00910    | 2            | 2              |
| Propanoate Metabolism                                  | 0.5666894 | ko00640    | 4            | 0              |
| Butanoate Metabolism                                   | 0.6619827 | ko00650    | 2            | 1              |
| Fatty Acid Metabolism                                  | 0.8388311 | ko00071    | 2            | 1              |
| Selenoamino acid Metabolism                            | 0.5913148 | ko00450    | 0            | 3              |
| Carotenoid Biosynthesis                                | 0.4691522 | ko00906    | 1            | 1              |
| Indole Alkaloid Biosynthesis                           | 0.1180905 | ko00901    | 1            | 1              |
| Linoleic Acid Metabolism                               | 0.7849148 | ko00591    | 1            | 1              |
| Sulfur Metabolism: Reduction and Fixation              | 0.5333963 | ko00920    | 1            | 1              |
| Folate Biosynthesis                                    | 0.8713562 | ko00790    | 0            | 1              |
| Nicotinate and Nicotinamide Metabolism                 | 0.6407041 | ko00760    | 1            | 0              |
| Sulfur Relay System                                    | 0.4003264 | ko04122    | 1            | 0              |

DAPs: differential abundance proteins.
